## Research Article

# Metabolic profiling of maternal serum of women at high-risk of spontaneous preterm birth using NMR and MGWAS approach

 **Juhi K. Gupta<sup>1,2</sup>, Angharad Care<sup>2</sup>, Laura Goodfellow<sup>2</sup>, Zarko Alfirovic<sup>2</sup>, Lu-Yun Lian<sup>3</sup>, Bertram Müller-Myhsok<sup>1,4</sup>, Ana Alfirovic<sup>1,2</sup> and Marie M. Phelan<sup>3</sup>**

<sup>1</sup>Wolfson Centre for Personalised Medicine, Department of Pharmacology and Therapeutics, Institute of Systems, Molecular and Integrative Biology, University of Liverpool, Liverpool, L69 3GL, UK; <sup>2</sup>Harris-Wellbeing Research Centre, University Department, Liverpool Women's Hospital, Liverpool, L8 7SS, UK; <sup>3</sup>NMR Centre for Structural Biology, Institute of Systems, Molecular and Integrative Biology, University of Liverpool, Liverpool, L69 7ZB, UK; <sup>4</sup>Max Planck Institute of Psychiatry, Munich 80804, Germany

**Correspondence:** Juhi K. Gupta (J.Gupta@liverpool.ac.uk)

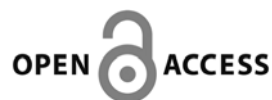

Preterm birth (PTB) is a leading global cause of infant mortality. Risk factors include genetics, lifestyle choices and infection. Understanding the mechanism of PTB could aid the development of novel approaches to prevent PTB. This study aimed to investigate the metabolic biomarkers of PTB in early pregnancy and the association of significant metabolites with participant genotypes. Maternal sera collected at 16 and 20 weeks of gestation, from women who previously experienced PTB (high-risk) and women who did not (low-risk controls), were analysed using <sup>1</sup>H nuclear magnetic resonance (NMR) metabolomics and genome-wide screening microarray. ANOVA and probabilistic neural network (PNN) modelling were performed on the spectral bins. Metabolomics genome-wide association (MGWAS) of the spectral bins and genotype data from the same participants was applied to determine potential metabolite-gene pathways. Phenylalanine, acetate and lactate metabolite differences between PTB cases and controls were obtained by ANOVA and PNN showed strong prediction at week 20 (AUC = 0.89). MGWAS identified several metabolite bins with strong genetic associations. *Cis*-eQTL analysis highlighted *TRAF1* (involved in the inflammatory pathway) local to a non-coding SNP associated with lactate at week 20 of gestation. MGWAS of a well-defined cohort of participants highlighted a lactate-*TRAF1* relationship that could potentially contribute to PTB.

## Introduction

Preterm birth (PTB) is defined by the World Health Organisation as birth prior to 37 weeks of gestation [1]. PTB complications are the leading cause of death in children under the age of five [2], but this multifactorial condition is not fully understood. Environmental factors are known to influence PTB and include nutrition, maternal stress or infection [1]. Metabolomics is a field that monitors global metabolism of a system, and this can be influenced by both environmental and genetic factors [3,4]. Clinical phenotypes of non-iatrogenic spontaneous labour include spontaneous preterm birth (SPTB) and PPRM (preterm premature rupture of membranes). To provide targeted SPTB preventative therapies, reliable biomarkers of women with pregnancies destined to labour prematurely are required. This can be achieved by understanding the pathophysiology behind the initiation of early labour. Different regulation axis between SPTB and PPRM have previously been suggested [5].

Many metabolomics studies applied less than 37 weeks of gestation as a cut-off for PTB [6,7] yet there is an inverse relationship between gestation at birth and morbidity and mortality on the infant. Fortunately, 70% of preterm births are late preterm births (34–36<sup>+6</sup>) and have a low burden of morbidity [8]. However,

Received: 01 April 2021  
Revised: 28 July 2021  
Accepted: 17 August 2021

Accepted Manuscript online:  
17 August 2021  
Version of Record published:  
31 August 2021

this makes it difficult to study the preterm pregnancies most in need of prevention. Therefore, in the present study we obtained cleaner phenotypes of PTB cases and defined outcomes as  $\leq 34$  weeks, in line with preterm birth prevention services in the UK [9].

Recent PTB metabolomics studies [6,10,11] have utilised non-targeted analytical techniques such as nuclear magnetic resonance (NMR) to identify biomarkers in systemic fluids: cervicovaginal fluid, blood plasma and urine respectively. Graca et al. [12], who applied mass-spectrometry, and Amabebe et al. [6] proposed several metabolite predictors for PTB including acetate, lactate, phenylalanine and other amino acids. NMR is a highly sensitive and reproducible method with high-throughput automated sample processing, which is advantageous for large sample size studies screening biofluids [13–16].

Probabilistic neural network (PNN), a supervised machine learning method, can accurately classify metabolomic data with respect to phenotype [17,18]. Rueedi et al. [19] applied metabolomics genome-wide association (MGWAS) method to gain an understanding of interactions between single-nucleotide polymorphisms (SNPs) and the metabolome in serum samples. As metabolites are phenotype-driven, associating metabolites with genome-wide data could enhance our knowledge of the pathways these metabolites are involved in. These, in addition to PNN, are novel approaches to understanding the mechanism of early labour.

Metabolic profiling to distinguish the different clinical subtypes of PTB, preterm premature rupture of the membranes (PPROM) and spontaneous preterm birth (SPTB) has not yet been reported. A non-invasive test of systematic fluids could help screen and diagnose women susceptible to PTB in early pregnancy allowing for closer monitoring and preventative treatment. This 'omics' approach can also improve sensitivity and specificity of biomarkers, compared with traditional clinical markers, by screening a population for multiple metabolites as reviewed by Monteiro et al. [20].

The present study aimed to investigate the serum metabolome from a unique cohort of high-risk PTB women in early pregnancy using untargeted 1-dimensional  $^1\text{H}$  (proton) NMR. An MGWAS approach was subsequently applied to investigate genetic contributions from the most promising metabolites with the aim to identify underlying pathways of early labour.

## Materials and methods

### Participant recruitment

Participants with singleton pregnancies, visiting between April 2012 to December 2017, were prospectively recruited at 16 and 20 weeks of gestation at the Liverpool Women's Hospital Preterm Birth Prevention Clinic. Research ethics approval was obtained from the North West Research Ethics Committee, (REC reference: 11/NW/0720) and informed consent was obtained from the participants. Clinical data on recruitment and delivery outcomes were collected and followed up in this nested case-control study. Women who previously experienced preterm birth ( $\leq 34$  weeks) and subsequently delivered  $\leq 37$  weeks in the index pregnancy were categorised as high-risk (HTERM). Low-risk control patients were parous women with all previous births at term and who delivered  $\geq 39$  weeks in the index pregnancy (LTERM). Women who had spontaneous PTB  $\leq 34^{+0}$  weeks gestation were reviewed and classified as a phenotype of SPTB or PPRM. All births were phenotyped by authors A.C. and L.G., any disagreement in classification was resolved by Z.A.

Participants were excluded if (i) they had a caregiver initiated preterm birth for other pregnancy specific pathology (e.g. pre-eclampsia), (ii) intrauterine death occurred, (iii) had multiple pregnancies, (iv) underwent iatrogenic PTB and (v) their spontaneous PTB occurred  $\geq 34^{+0}$  weeks. Women from the low-risk control cohort were included if they delivered  $\geq 39$  weeks (and excluded if they delivered  $< 39$  weeks or received PTB prevention treatment [progesterone, cervical pessary or cervical cerclage]). There is now ample evidence that many infants born at 38 weeks of gestation or less experience an increase in neonatal mortality and even lifetime morbidity related to immaturity of one or more organs when compared with infants born at 39 weeks or greater [21–25]. The arbitrary definition of a healthy term birth being anything at or greater than 37 weeks does not correspond with functional maturity and as such may make this definition redundant. For this reason, we, in agreement with others [26] believe defining term births as those occurring at 39 weeks more appropriate.

This article will hereon refer to all non-iatrogenic spontaneous PTB as sPTB (the sub-categories of which are SPTB and PPRM).

### Sample collection

Samples were collected from all women who attended the clinic at 16 and 20 weeks of gestation. In addition, women who only attended the clinic at either 16 or 20 weeks of gestation were included (7.8% of all women sampled). Maternal

serum samples were collected in BD vacutainer<sup>®</sup> with clot activators and stored at room temperature (20–25°C) for 30 min. The samples were centrifuged at 3000 rpm at 4°C for 10 min. Aliquots of 500 µl were prepared and stored at –80°C.

## Sample preparation and NMR acquisition

Serum (500 µl) was thawed at room temperature and diluted with 500 µl of 200 mM phosphate (PO<sub>4</sub><sup>3-</sup>) buffer (pH 7.4) and deuterated water. Phosphate buffer was made using dibasic sodium phosphate (Na<sub>2</sub>HPO<sub>4</sub>, VWR International, US: Mr = 141.96) and monobasic sodium phosphate (NaH<sub>2</sub>PO<sub>4</sub>, Acros Organics Fisher Scientific, UK: Mr = 119.98) in 20% <sup>2</sup>H<sub>2</sub>O (Sigma, UK). In approximately 4.5% of samples, serum volume available was <500 µl, 200 µl of ddH<sub>2</sub>O was added to ensure a volume of >500 µl diluted serum (all samples were normalised including those diluted to mitigate batch effects and the diluted samples were spread equitably between all four sample groups, ranging between 2.4 and 5.6%). Samples were briefly vortexed and centrifuged at 21.5 rpm (~21,500 g), 4°C for 5 min. Serum-buffer mix (600 µl) was transferred into 5 mm diameter NMR tubes for processing on the 600 MHz NMR solution-state spectrometer Bruker Avance III system (Bruker, GmbH, Germany). A one-dimensional vendor supplied (1D) Carr-Purcell-Meiboom-Gill (CPMG) pulse sequence was applied to attenuate signals from high molecular weight components [27]. Spectra were acquired at 37°C, with 32 transients, 20 ppm spectral width with 4s inter-scan delay – full parameter sets are available with the deposited dataset (MTBLS1990). Spectra were automatically processed via standard vendor routines to ensure consistent Fourier transformation, window function and phasing (Bruker macro apk0.noe). Spectra were aligned indirectly to Trimethylsilyl propionate via glucose anomeric doublet (5.204 ppm). Quality control (QC) measures were performed manually according to 'The Metabolite Standards Initiative' – MSI [28] briefly via measurement of the Line-Width Half Height (LWHH) of a representative peak – the anomeric glucose located 5.244 ppm (< 3 Hz), ensuring a flat baseline for each sample spectrum, checking consistent signal-to-noise ratio across spectra and ensuring good water suppression (i.e. water signal is narrow, and < 0.4 ppm wide). Where the spectra failed QC the sample were repeated.

## Metabolite annotation and identification

Metabolite annotation was determined through peak fitting of serum spectra initially using the metabolite library provided through Chenomx software v8.2 (Chenomx Inc., Canada) followed by comparison to in-house library spectra for specific metabolites of interest (using 1D <sup>1</sup>H and 2D <sup>1</sup>H <sup>13</sup>C HSQC where appropriate standard spectra acquired on the same instruments under identical conditions). Peaks were converted to spectra 'bins' by manual preparation of a 'pattern file' (a text file generated manually defining the left and right ppm boundaries for each individual peak [or multiplet] in the spectrum). Peaks were then integrated over each bin boundary and divided by the width of each bin using the software AMIX (Bruker, Coventry U.K.). The resultant bin or bucket table contained 145 individual bins, 99 with metabolite specific annotation corresponding to 34 unique metabolites. A further 46 bins that were not assigned to known metabolite signals. Metabolite annotations and identifications are defined as per 'The Metabolite Standards Initiative' – MSI [28], briefly metabolites annotated to an external library (i.e. Chenomx) were assigned to 'level 2 - annotation' whereas metabolites with identities confirmed using two independent terms (such as <sup>1</sup>H and <sup>13</sup>C chemical shifts) from an in-house source were assigned to 'level 1 - identification'. Representative spectra can be found in Supplementary Figure S1. Peak boundaries (pattern file) associated annotations and raw data are accessible via open access repository MetaboLights [29], study ID: MTBLS1990.

## NMR spectral bins analysis

Univariate statistical analysis was performed using R statistical computing environment [r-project.org]. Data were first normalised per spectrum using Probabilistic Quotient Normalisation (PQN) [30] to offset any dilution effects from the sample preparation. One-way ANOVA with Tukey's HSD multiple testing was employed on the 145 variable dataset using R packages 'car' (Companion to Applied Regression). The four individual phenotypes (HTERM, LTERM, SPTB and PPRM) were included in the analysis and a significance level of *P* < 0.05 was applied [31]. MetaboAnalyst was used to perform multivariate analysis with spectra normalised to the median and variables scaled using the Pareto method. Principal component analysis (PCA) was employed to appraise spectra quality and ensure no outliers were present and partial least squares discriminant analysis (PLS-DA) a widely used supervised, multivariate, classification method in chemometrics. PLS-DA classification, with 10-fold cross-validation to evaluate the predictive model, using R packages 'pls' [32] and 'caret' [33]. The *Q*<sup>2</sup> value describes the cross-validated sum of squares (*R*<sup>2</sup>), which is provided with the model prediction accuracy score by MetaboAnalyst [34]. The PNN algorithm was executed on all 145 metabolite bins per timepoint using a predictive modelling software: DTREG (<https://www.dtreg.com/>)

[35]. Leave-one-out cross-validation (LOOCV) was applied and the AUC values obtained for each gestation time-point. For this analysis, the phenotypes were combined: sPTB cases (SPTB and PPRM) and controls (HTERM and LTERM).

## DNA preparation and genome-wide screening

DNA was extracted from whole blood using the Chemagenic Magnetic Separation Module I (Auto Q Biosciences Ltd, U.K.) and were processed on the Applied Biosystems™ UK Biobank Axiom™ array (Thermo Fisher Scientific) for genome-wide screening by the Oxford Genomics Centre at the Wellcome Centre for Human Genetics.

## Genome-wide association (GWAS) data quality control and imputation

Genotypes acquired from the UK Biobank Axiom™ array (Thermo Fisher) were analysed using PLINK v1.9 software [36]. Data quality control (QC) was carried out using the methods described by Anderson et al. [37] and Marees et al. [38]. QC steps involved removing SNPs with low genotype call rate, or high proportion of SNP missingness; checking for gender discrepancies based on heterozygosity in chromosome X; excluding SNPs with low minor allele frequency (MAF) of < 1% and removing SNPs deviating from Hardy–Weinberg Equilibrium (HWE) at  $P \leq 1 \times 10^{-6}$ . Samples with high or low heterozygosity rates ( $\pm 3$  standard deviations from the mean) or close relatedness ( $\pi$ -hat score > 0.2) were excluded. Individuals not genetically assigned to European ancestry (CEU) population based on the HapMap data were also excluded from the study [39,40]. A total of 618,283 SNPs were uploaded on to the Michigan Imputation Server for phasing chromosome 1 to 22 using Eagle v2.3 and imputation (using the minimac3 algorithm) against HRC r1.1 2016 panel [41,42]. Post-imputation QC steps involved removing variants with  $R^2 < 0.3$  [43] and MAF = 0 (or < 1%).

## MGWAS and SNP annotation

Inverse-rank normalisation was applied to all the metabolite bin relative peak abundances. Frequentist association test of the GWAS SNP data and the NMR metabolite bins as a continuous outcome was completed using SNPTTEST v2.5 [44–46]. Manhattan plots were generated using qqman R package [47]. Total number of samples included at week 16,  $n=251$  and at week 20,  $n=265$ .

SNPs above suggestive threshold of  $1 \times 10^{-5}$  were selected from each MGWAS analysis and further investigated for functional annotation of the SNPs and expression quantitative trait locus (eQTL) FUMA GWAS (Functional Mapping and Annotation of Genome-Wide Association Studies) SNP2GENE [48].

## eQTL mapping and enrichment analysis

Lead SNPs were defined as  $P \leq 1 \times 10^{-5}$  using 1000Genomes phase 3 European population [49,50] as the reference panel, GTEx v8 database tissue types for eQTL mapping and eQTL FDR  $P < 0.05$  cut-off. For gene set enrichment analysis and annotation in biological context, SNP2GENE results of genome-wide significant SNPs were submitted to FUMA GENE2FUNC, using GTEx v8 tissue types.

# Results

## Participants

A total of 567 women were recruited and categorised into delivery phenotypes or excluded from the study (Figure 1A).

Table 1 summarises the participant demographics included in metabolomics analyses, after three samples were excluded at week 20, due to EDTA contamination (Figure 1B). Recruits missing visits at either timepoint remained in the analyses as a single sample.

## Metabolomics findings

ANOVA, with Tukey's HSD of the four individual phenotypes, showed 22 metabolite bins at week 16 to be significant ( $P < 0.05$ ) mainly between the control groups LTERM and HTERM (Table 2). Four metabolite bins were significant (Tukey's post-hoc  $P < 0.05$ ) for SPTB-LTERM comparison: these were unknown (3.32 ppm), unknown (7.28 ppm), unknown (4.40 ppm) and glucarate (4.14 ppm). When comparing PPRM-LTERM, only three bins were significant ( $P < 0.05$ ): unknown (3.32 ppm), unknown (3.28 ppm) and unknown (3.30 ppm).

ANOVA of week 20 metabolite bins highlighted 34 significant bins (Tukey's post-hoc  $P < 0.05$ ), 12 more than week 16 (Table 3). SPTB-LTERM showed 15 metabolite bins were significant at  $P < 0.05$ , 11 bins for PPRM-LTERM and



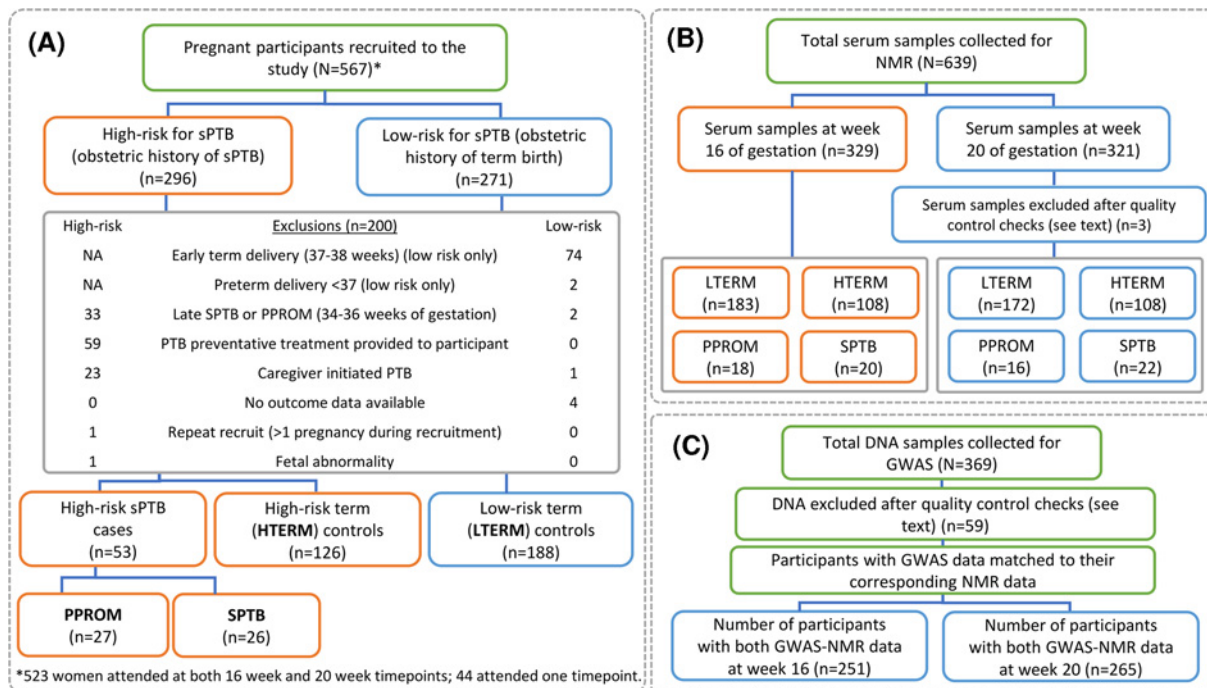

**Figure 1. Schematic of pregnant participants recruited to the Liverpool preterm birth study cohort and the number of samples acquired**

(A) Final number of women for each phenotypic group included in the analyses. (B) Serum samples were collected from participants at 16 and/or 20 weeks of gestation (of those included in the study analyses) for metabolomics. (C) Whole blood-extracted DNA was collected for genotyping (for women included in the study analyses); GWAS, genome-wide association study; HTERM, high-risk term births; LTERM, low-risk term births; NMR, nuclear magnetic resonance; PPROM, preterm premature rupture of membranes; sPTB, spontaneous preterm birth (including PPROM and SPTB); SPTB, spontaneous preterm birth.

1 bin (unknown [7.28 ppm], Tukey's post-hoc  $P = 0.036$ ) for SPTB-HTERM. Unknown (3.32 ppm) and unknown (3.28 ppm) were also significant in week 20 similarly to week 16, warranting further investigation. More annotated metabolites were identified at week 20, such as 2-hydroxybutyrate (4.02 ppm) ( $P = 2.16E-05$ ) and creatinine (4.06 ppm) ( $P = 1.63E-04$ ). More LTERM and SPTB/PPROM comparisons were significant ( $P < 0.05$ ), including lactate and glucarate (4.13 ppm), lactate (4.11 ppm) and lactate (1.33 ppm).

Multivariate supervised discriminant analysis demonstrated no clear separation of clusters of the four different clinical groups and poor prediction. At week 16, PLS-DA yielded an  $R^2 = 0.034$ ,  $Q^2 = 0.014$ , 3-components (Supplementary Figure S2). Similarly, at week 20, PLS-DA model yielded  $R^2 = 0.06$ ,  $Q^2 = 0.007$ , 3-components (Supplementary Figure S3).

## Predictive modelling using probabilistic neural networks

As PLS-DA did not show clear discrimination between SPTB and PPROM, PNN analysis of all the metabolite bins was conducted between sPTB cases combined (PPROM and SPTB) and controls at week 16 gestation and showed moderate predictive power  $AUC = 0.77$  (LOOCV) (Supplementary Table S1). Unknown (3.32 ppm) bin had the highest rank in the week 16 prediction model, which is consistent with the univariate analyses as shown in the log fold change diagram [51] (Tables 2 and 3; Figure 2A).

PNN analysis at week 20 of gestation obtained stronger predictive power with  $AUC = 0.89$  than week 16 (Supplementary Table S1). Unknown (7.28 ppm) was another top hit followed by creatinine (4.06 ppm) as with the ANOVA results. Further matches with ANOVA at week 20 were observed for lactate and glucarate (4.13 ppm), lactate (4.11 ppm) and phenylalanine (7.43 ppm), which also scored highly in the PNN model (Figure 2B).

## MGWAS and SNP annotation results

A total of 251 women at week 16 and 265 women at week 20 had both GWAS and NMR data available and were included in MGWAS analyses (Figure 1C). Of 290 MGWAS analyses at both timepoints, the lowest  $P$ -value and

**Table 1** Baseline demographics of PTB metabolomics participants at week 16 and 20 of gestation

|                                       | Week 16 of gestation |               |              |             | P value                      | Week 20 of gestation |               |              |             | P value                      |
|---------------------------------------|----------------------|---------------|--------------|-------------|------------------------------|----------------------|---------------|--------------|-------------|------------------------------|
|                                       | LTERM (N=183)        | HTERM (N=108) | PPROM (N=18) | SPTB (N=20) |                              | LTERM (N=172)        | HTERM (N=108) | PPROM (N=16) | SPTB (N=22) |                              |
| Age                                   |                      |               |              |             | <b>0.837<sup>1</sup></b>     |                      |               |              |             | <b>0.750<sup>1</sup></b>     |
| Mean (SD)                             | 31.0 (4.7)           | 30.5 (5.1)    | 30.8 (4.9)   | 30.9 (6.4)  |                              | 31.2 (4.6)           | 30.8 (5.2)    | 29.9 (4.8)   | 30.8 (5.9)  |                              |
| BMI                                   |                      |               |              |             | <b>0.393<sup>2</sup></b>     |                      |               |              |             | <b>0.394<sup>2</sup></b>     |
| Median                                | 24.0 (17.0,          | 25.0 (18.0,   | 25.0 (17.0,  | 28.0 (17.0, |                              | 24.0 (17.0,          | 25.0 (18.0,   | 25.0 (17.0,  | 27.5 (17.0, |                              |
| Range)                                | 57.0)                | 43.0)         | 39.0)        | 49.0)       |                              | 57.0)                | 43.0)         | 39.0)        | 49.0)       |                              |
| Smoking                               |                      |               |              |             | <b>0.009<sup>3</sup></b>     |                      |               |              |             | <b>0.095<sup>3</sup></b>     |
| NA                                    | 2 (1.1%)             | 1 (0.9%)      | 1 (5.6%)     | 0 (0.0%)    |                              | 2 (1.2%)             | 1 (0.9%)      | 0 (0.0%)     | 0 (0.0%)    |                              |
| No                                    | 163 (89.1%)          | 82 (75.9%)    | 12 (66.7%)   | 16 (80.0%)  |                              | 154 (89.5%)          | 85 (78.7%)    | 12 (75.0%)   | 18 (81.8%)  |                              |
| Yes                                   | 18 (9.8%)            | 25 (23.1%)    | 5 (27.8%)    | 4 (20.0%)   |                              | 16 (9.3%)            | 22 (20.4%)    | 4 (25.0%)    | 4 (18.2%)   |                              |
| Ethnicity                             |                      |               |              |             | <b>0.251<sup>3</sup></b>     |                      |               |              |             | <b>0.150<sup>3</sup></b>     |
| White                                 | 177 (96.7%)          | 99 (91.7%)    | 17 (94.4%)   | 20 (100.0%) |                              | 166 (96.5%)          | 99 (91.7%)    | 14 (87.5%)   | 22 (100.0%) |                              |
| Black                                 | 3 (1.6%)             | 8 (7.4%)      | 1 (5.6%)     | 0 (0.0%)    |                              | 3 (1.7%)             | 7 (6.5%)      | 1 (6.2%)     | 0 (0.0%)    |                              |
| Other                                 | 2 (1.1%)             | 0 (0.0%)      | 0 (0.0%)     | 0 (0.0%)    |                              | 2 (1.2%)             | 0 (0.0%)      | 0 (0.0%)     | 0 (0.0%)    |                              |
| NA                                    | 1 (0.5%)             | 1 (0.9%)      | 0 (0.0%)     | 0 (0.0%)    |                              | 1 (0.6%)             | 2 (1.9%)      | 1 (6.2%)     | 0 (0.0%)    |                              |
| No. of prior SPTB/PPROM <34 weeks     |                      |               |              |             |                              |                      |               |              |             |                              |
| 0                                     | 183 (100.0%)         | 0 (0.0%)      | 0 (0.0%)     | 0 (0.0%)    |                              | 172 (100.0%)         | 0 (0.0%)      | 0 (0.0%)     | 0 (0.0%)    |                              |
| 1                                     | 0 (0.0%)             | 102 (94.4%)   | 13 (72.2%)   | 14 (70.0%)  |                              | 0 (0.0%)             | 102 (94.4%)   | 12 (75.0%)   | 16 (72.7%)  |                              |
| 2                                     | 0 (0.0%)             | 6 (5.6%)      | 4 (22.2%)    | 5 (25.0%)   |                              | 0 (0.0%)             | 6 (5.6%)      | 3 (18.8%)    | 5 (22.7%)   |                              |
| 3                                     | 0 (0.0%)             | 0 (0.0%)      | 0 (0.0%)     | 0 (0.0%)    |                              | 0 (0.0%)             | 0 (0.0%)      | 0 (0.0%)     | 0 (0.0%)    |                              |
| 4                                     | 0 (0.0%)             | 0 (0.0%)      | 1 (5.6%)     | 1 (5.0%)    |                              | 0 (0.0%)             | 0 (0.0%)      | 1 (6.2%)     | 1 (4.5%)    |                              |
| Previous significant cervical surgery |                      |               |              |             | <b>0.032<sup>3</sup></b>     |                      |               |              |             | <b>0.135<sup>3</sup></b>     |
| No                                    | 180 (98.4%)          | 108 (100.0%)  | 16 (88.9%)   | 20 (100.0%) |                              | 169 (98.3%)          | 108 (100.0%)  | 15 (93.8%)   | 22 (100.0%) |                              |
| Yes <sup>4</sup>                      | 3 (1.6%)             | 0 (0.0%)      | 2 (11.1%)    | 0 (0.0%)    |                              | 3 (1.7%)             | 0 (0.0%)      | 1 (6.2%)     | 0 (0.0%)    |                              |
| Gestation at sampling (days)          |                      |               |              |             | <b>&lt;0.001<sup>2</sup></b> |                      |               |              |             | <b>&lt;0.001<sup>2</sup></b> |
| Median (IQR)                          | 117.0 (5)            | 114.0 (5)     | 113.5 (5)    | 113.5 (5.2) |                              | 144.5 (5)            | 142.0 (5)     | 143.5 (6.5)  | 143.0 (3.8) |                              |

Participant serum samples collected at these timepoints, included in the analyses, are shown in these final numbers.

<sup>1</sup>Linear Model ANOVA.

<sup>2</sup>Kruskal–Wallis rank sum test.

<sup>3</sup>Fisher's Exact Test for Count Data.

<sup>4</sup>Previous large loop excision of the transformation zone (LLETZ), multiple LLETZ or Knife Cone Biopsy.

strongest genetic association with relative peak intensity was observed at week 16 for phenylalanine (7.43 ppm) with rs117209391 (a non-coding RNA, see Supplementary Table S2) reaching genome-wide significance (Figure 3). Several signals observed across the remaining MGWAS analyses did not reach the genome-wide significance threshold.

Genome-wide significant ( $P < 5 \times 10^{-8}$ ) SNPs in nine metabolite bins were identified, including phenylalanine (7.43 ppm), 2-hydroxybutyrate (0.92 ppm), proline (3.37 ppm), lactate (4.11 ppm), unknown (7.06 ppm) and proline (2.33 ppm) at week 16 and glucose (3.77 ppm), myoinositol (3.58 ppm) and lactate (4.11 ppm) at week 20 (Supplementary Table S2).

FUMA SNP annotation of MGWAS results identified one exonic SNP in unknown (5.39 ppm), week 16 metabolite bin (chr:bp 20:19941367, rs45481396,  $P = 1.85E-06$ ), the remaining SNPs were in non-coding regions. Rs45481396, located in a protein coding gene *RIN2* (Ras and Rab Interactor 2), is involved in membrane trafficking processes.

## eQTL and enrichment analysis

*Cis*-eQTL mapping of genome-wide significant SNPs identified one gene, *TRAF1* (tumour necrosis factor receptor associated factor 1) for lactate (4.11 ppm) at week 16 (Supplementary Table S2). This suggests that the non-coding SNP detected in the week 16 lactate (4.11 ppm) MGWAS (rs7867041, intergenic RP11-360A18.1,  $P = 3.08 \times 10^{-8}$ ) could influence gene expression of the neighbouring gene, *TRAF1*. *TRAF1* is involved in multiple immune/inflammatory related pathways such as TNF signalling and NF-kappa B signalling pathway (including interleukins) (KEGG ID: 04064) as recorded in the KEGG database [52].

However, gene set enrichment analysis with the GTEx database did not show any differential expression in reproductive or pregnancy-associated tissues. Contrary to this, enrichment analysis of lactate (4.11 ppm) at week 20,

**Table 2 Summary of 22 significant metabolite bins ( $P < 0.05$ ) at week 16 of gestation shown by ANOVA with Tukey's HSD**

| Metabolite bin (chemical shift in ppm) | P-value  | Tukey's HSD | P-adjusted |
|----------------------------------------|----------|-------------|------------|
| Unknown (3.32)                         | 1.90E-07 | LTERM-HTERM | 2.67E-05   |
|                                        |          | SPTB-LTERM  | 0.002      |
|                                        |          | PPROM-LTERM | 0.003      |
| Unknown (3.28)                         | 2.30E-04 | PPROM-LTERM | 0.010      |
|                                        |          | LTERM-HTERM | 0.012      |
| Unknown (7.28)                         | 4.88E-04 | SPTB-LTERM  | 0.003      |
| Unknown (3.3)                          | 0.001    | PPROM-LTERM | 0.013      |
|                                        |          | LTERM-HTERM | 0.026      |
| Unknown (4.40)                         | 0.005    | SPTB-LTERM  | 0.019      |
| Glucarate (4.14)                       | 0.005    | SPTB-LTERM  | 0.011      |
| Phenylalanine (7.43)                   | 0.005    | NA          | NA         |
| Tyrosine (6.90)                        | 0.006    | LTERM-HTERM | 0.020      |
| Creatine40 (3.93)                      | 0.01     | LTERM-HTERM | 0.013      |
| Unknown (1.92)                         | 0.011    | LTERM-HTERM | 0.010      |
| Acetate (1.92)                         | 0.011    | LTERM-HTERM | 0.009      |
| Unknown (3.92)                         | 0.013    | LTERM-HTERM | 0.010      |
| Glucose (3.91)                         | 0.014    | LTERM-HTERM | 0.007      |
| Choline (3.19)                         | 0.019    | LTERM-HTERM | 0.020      |
| NDMA (3.15)                            | 0.022    | LTERM-HTERM | 0.021      |
| Glucose (3.52)                         | 0.027    | LTERM-HTERM | 0.015      |
| Mobile lipids (1.23)                   | 0.028    | LTERM-HTERM | 0.035      |
| 2-Hydroxybutyrate (4.02)               | 0.039    | NA          | NA         |
| Glucose (3.78)                         | 0.043    | LTERM-HTERM | 0.027      |
| Unknown (3.63)                         | 0.044    | LTERM-HTERM | 0.033      |
| Unknown (3.56)                         | 0.048    | NA          | NA         |

A total of 12 bins were annotated metabolites and 10 were unknown. HTERM ( $n=108$ ), LTERM ( $n=183$ ), PPROM ( $n=18$ ) and SPTB ( $n=20$ ). NA = the individual outcome comparison did not meet the  $P \leq 0.05$  cut-off.

demonstrated that gene sets were upregulated in breast tissue (FDR,  $P = 0.039$ ) in GTE<sub>x</sub> (Supplementary Figure S4). This was also true for uterus ( $P = 0.032$ ), but this was not significant after FDR adjustment (FDR,  $P = 0.97$ ).

## Discussion

Significant differences ( $P < 0.05$ ) determined between term and sPTB in the metabolite profiles include phenylalanine (7.43 ppm) and acetate (1.92 ppm) at week 16 and creatinine (4.06 ppm), lactate and glucarate (4.13 ppm), lactate (4.11 ppm) and lactate (1.33 ppm) at week 20 between controls and sPTB cases (Tables 1 and 2; Figure 2). PNN also showed strong contribution of these metabolites, particularly at week 20 of gestation (AUC = 0.89).

Acetate and lactate were detected in cervicovaginal fluid, using NMR, in preterm symptomatic pregnant women at 20–22 weeks of gestation [6]. Phenylalanine (and leucine/isoleucine, histidine, and valine) were found in amniotic fluid, at 16–21 weeks gestation, investigated using mass-spectrometry [12]. Our cohort, comprised of sPTB cases and healthy controls at two early gestational timepoints, yielded similar results as shown by ANOVA and PNN.

There are several strengths of our study: (1) clinically well-defined phenotype in early pregnancy of a prospective cohort of women with pre-defined inclusion/exclusion criteria and clearly defined control groups: first, women at high-risk of sPTB with a history of sPTB in previous pregnancy; second, women at low-risk of sPTB with previous term birth; (2) inclusion of sPTB cases only if  $\leq 34$  weeks at birth; (3) availability of multi-omic data in the same individual at two timepoints and the novelty in analytical approaches including PNN; (4) rigorous quality control of clinical, experimental and analytical data.

One novel aspect of the present study was the combination of metabolomics and genotype data from the same participants in the sPTB cohort, which were applied in MGWAS association analyses. Identification of SNP associations with each metabolite bin was a non-standard approach implemented to gain insights of molecular pathways contributing to sPTB phenotypes. A strong genetic association of phenylalanine (7.43 ppm) and lactate (4.11 ppm) bins at week 16 and lactate (4.11 ppm) at week 20 with the sPTB cohort genome-wide data were determined (Figure

**Table 3 Summary of 34 significant metabolite bins at week 20 of gestation with  $P < 0.05$  ANOVA with Tukey's HSD**

| Metabolite bin (chemical shift in ppm) | Annotation level (MSI) | P-value  | Tukey's HSD | P-adjusted |
|----------------------------------------|------------------------|----------|-------------|------------|
| Unknown (3.32)                         | 4                      | 4.77E-08 | LTERM-HTERM | 7.27E-05   |
|                                        |                        |          | PPROM-LTERM | 1.20E-04   |
|                                        |                        |          | SPTB-LTERM  | 0.002      |
| 2-Hydroxybutyrate (4.02)               | 2                      | 2.16E-05 | PPROM-LTERM | 0.001      |
|                                        |                        |          | LTERM-HTERM | 0.007      |
|                                        |                        |          | SPTB-LTERM  | 0.024      |
| Unknown (7.28)                         | 4                      | 5.12E-05 | SPTB-LTERM  | 1.15E-04   |
|                                        |                        |          | LTERM-HTERM | 0.025      |
|                                        |                        |          | SPTB-HTERM  | 0.036      |
| Creatinine (4.06)                      | 1                      | 1.63E-04 | SPTB-LTERM  | 0.002      |
|                                        |                        |          | PPROM-LTERM | 0.017      |
|                                        |                        |          | LTERM-HTERM | 0.022      |
| Glucarate and myoinositol (4.04)       | 2 and 1                | 2.51E-04 | PPROM-LTERM | 0.012      |
|                                        |                        |          | SPTB-LTERM  | 0.022      |
|                                        |                        |          | LTERM-HTERM | 0.022      |
| Unknown (3.28)                         | 4                      | 0.003    | PPROM-LTERM | 0.011      |
| Lactate and glucarate (4.13)           | 1 and 2                | 0.004    | PPROM-LTERM | 0.033      |
|                                        |                        |          | SPTB-LTERM  | 0.035      |
|                                        |                        |          | LTERM-HTERM | 0.043      |
| Lactate (1.33)                         | 1                      | 0.004    | SPTB-LTERM  | 0.043      |
| Lactate (4.11)                         | 1                      | 0.004    | PPROM-LTERM | 0.044      |
|                                        |                        |          | SPTB-LTERM  | 0.038      |
|                                        |                        |          | LTERM-HTERM | 0.048      |
| Unknown (4.40)                         | 4                      | 0.005    | PPROM-LTERM | 0.026      |
| Propylene-glycol (1.15)                | 1                      | 0.005    | PPROM-LTERM | 0.002      |
|                                        |                        |          | PPROM-HTERM | 0.017      |
|                                        |                        |          | LTERM-HTERM | 0.010      |
| Choline (3.19)                         | 2                      | 0.011    | LTERM-HTERM | 0.026      |
| 2-Hydroxyvalerate (4.07)               | 2                      | 0.012    | SPTB-LTERM  | 0.030      |
|                                        |                        |          | LTERM-HTERM | 0.018      |
|                                        |                        |          | SPTB-LTERM  | 0.046      |
| Proline (2.33)                         | 1                      | 0.012    | SPTB-LTERM  | 0.046      |
| NDMA (3.15)                            | 2                      | 0.013    | LTERM-HTERM | 0.018      |
| 3-Hydroxybutyrate (4.16)               | 2                      | 0.013    | SPTB-LTERM  | 0.014      |
|                                        |                        |          | LTERM-HTERM | 0.036      |
|                                        |                        |          | SPTB-LTERM  | 0.027      |
| Myoinositol (3.58)                     | 1                      | 0.013    | SPTB-LTERM  | 0.027      |
| 3-Hydroxybutyrate (1.20)               | 2                      | 0.015    | LTERM-HTERM | 0.036      |
|                                        |                        |          | SPTB-LTERM  | 0.022      |
|                                        |                        |          | LTERM-HTERM | 0.043      |
| Glucarate (4.14)                       | 2                      | 0.016    | SPTB-LTERM  | 0.022      |
| Acetoacetate (2.23)                    | 1                      | 0.017    | SPTB-LTERM  | 0.043      |
| Unknown (1.09)                         | 4                      | 0.017    | LTERM-HTERM | 0.047      |
| Glutamate (2.26)                       | 1                      | 0.018    | NA          | NA         |
|                                        |                        |          | NA          | NA         |
|                                        |                        |          | NA          | NA         |
| 2-Hydroxyvalerate and arginine (1.62)  | 2 and 1                | 0.02     | NA          | NA         |
|                                        |                        |          | NA          | NA         |
|                                        |                        |          | NA          | NA         |
| Unknown (3.34)                         | 4                      | 0.021    | NA          | NA         |
| Mobile lipids (1.29)                   | 3                      | 0.03     | NA          | NA         |
| Unknown (1.41)                         | 4                      | 0.031    | NA          | NA         |
| Unknown (4.46)                         | 4                      | 0.032    | NA          | NA         |
| Unknown (1.54)                         | 4                      | 0.032    | NA          | NA         |
| 3-Hydroxybutyrate (2.42)               | 2                      | 0.039    | SPTB-LTERM  | 0.025      |
|                                        |                        |          | NA          | NA         |
|                                        |                        |          | LTERM-HTERM | 0.035      |
| Mannose (5.19)                         | 1                      | 0.046    | NA          | NA         |
| Glutamate (2.48)                       | 1                      | 0.047    | LTERM-HTERM | 0.035      |
| Phenylalanine (7.43)                   | 1                      | 0.049    | NA          | NA         |
| Unknown (2.78)                         | 4                      | 0.049    | NA          | NA         |

Of these bins, 24 were annotated metabolites and 10 were unknown [28]. HTERM ( $n=108$ ), LTERM ( $n=172$ ), PPROM ( $n=16$ ) and SPTB ( $n=22$ ). NA = the individual outcome comparison is borderline  $P > 0.05$  and therefore does not meet the  $P \leq 0.05$  cut-off.



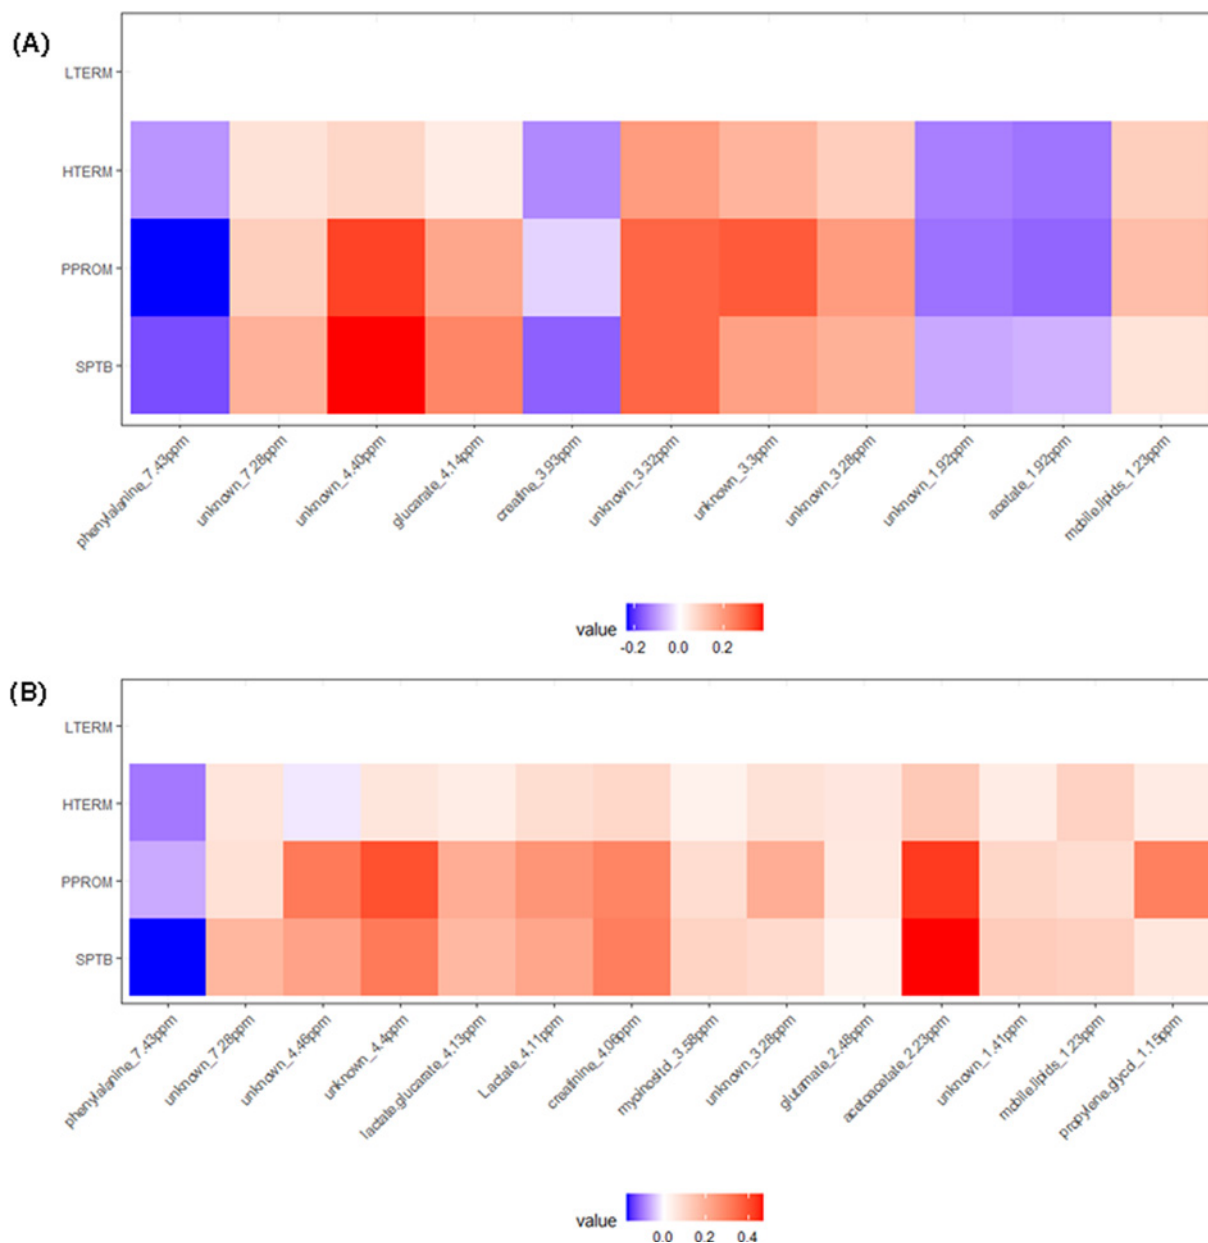

**Figure 2. Log fold change diagrams of <sup>1</sup>H NMR significant metabolite bins identified from univariate and multivariate analyses**

Individual pregnancy outcome groups were compared, where LTERM was the control group at (A) week 16 of gestation (11 metabolite bins) ( $N=329$ ) and (B) week 20 of gestation (14 metabolite bins) ( $N=318$ ). Red indicates positive fold change and blue for negative fold change with respect to LTERM. Plots were generated using 'ggplot2' R package [51] and R script developed by R. Grosman, 2017 (University of Liverpool).

3). Due to low prevalence of these SNPs in this cohort, the outcomes could not be associated with the SNPs; however, meta-analysis with similar cohorts could allow for a robust comparison.

SNP annotation of the known bins indicated non-coding gene regions. FUMA cis-eQTL analysis identified neighbouring gene, *TRAF1*, in association with the leading SNP significant ( $P < 5 \times 10^{-8}$ ) in lactate (4.11 ppm) metabolite bin at week 16 of gestation. *TRAF1* is related to similar signalling pathways involving NF- $\kappa$ B, of which *NFKB1* gene was previously reported in a literature-informed analysis by Bacelis et al. [53] and reviewed by MacIntyre et al. [54] as a potential biomarker of PTB. TRAF1 forms a heterodimeric complex with TRAF2, which was associated with

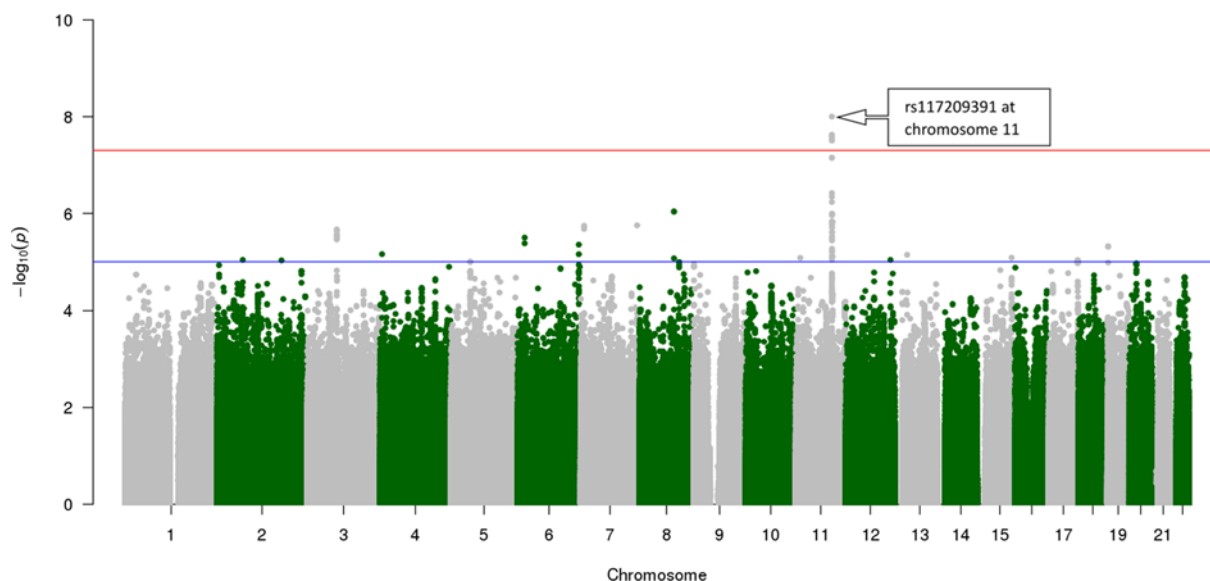

**Figure 3. Manhattan plot of phenylalanine (7.43 ppm) metabolite bin GWAS analysis at week 16 of gestation**

Spectra were obtained from  $^1\text{H}$  NMR of preterm birth maternal serum ( $N=251$ ). Chromosome 11 SNP rs117209391 ( $P = 9.96 \times 10^{-9}$ ), reached genome-wide significance ( $P < 5 \times 10^{-8}$ , red line). A strong association was observed between phenylalanine (7.43 ppm) metabolite peak intensity and genome-wide data. This plot was generated using R package, qqman [47].

PTB [55]. The complex acts as a mediator of anti-apoptotic signals from TNF receptors [55], which also indicates the role of the *TRAF1* gene in the inflammatory pathway. Other studies have indicated the role of innate immune cells in producing lactate when activated by an inflammation response [56,57]. This suggests that *TRAF1* could be part of the activation of inflammation processes, which in turn activate immune cells that secrete lactate detectable in serum. This could explain the lactate differences between sPTB cases and controls identified by ANOVA and PNN. Further analysis is required to confirm this hypothesis, however, raised lactate indicating disease other than a non-genetic biological response (e.g. sepsis and cardiac arrest [58]) is highly unlikely as these women presented well to their outpatient clinical appointments and were reviewed by obstetricians trained in the identification of disease in pregnancy.

Gene set enrichment analysis with GTEx database highlighted lactate at week 20 elevated in cervix tissue (Supplementary Figure S4) has been previously reported in the literature [6]. Our enrichment analysis suggested that lactate was elevated in breast tissue, but there is no association with preterm birth in the current literature.

Some limitations of the study include the variability in metabolic profiles in NMR studies on biofluids caused by exogenous substances or environmental factors, such as drugs or food intake. This was taken into consideration in the present study by following up the univariate analysis with PNN. This unbiased modelling approach confirmed contribution of similar metabolites as found in the ANOVA.

Despite reporting on one of the largest prospective recruitments of sPTB < 34 weeks cases by targeting a high-risk population, the number of overall cases were low especially when sub-classified into SPTB and PPROM. However, the study design allowed univariate and multivariate analyses at two timepoints and with multiple omics datasets in this phenotypically well-defined cohort. ANOVA identified many differences between LTERM (healthy controls) and sPTB cases, which could contribute to the preterm phenotypes. However, the metabolic profile of HTERM women could share similarities with those who experience a recurrent sPTB, as all high-risk participants previously experienced sPTB, unlike LTERM. PLS-DA could not distinguish between the four phenotype groups, potentially due to the low numbers; however, combining sPTB cases and controls for PNN analysis demonstrated differences between cases and controls, whilst displaying predictive power.

There are several unknown metabolites associated with ANOVA and PNN. Further work is underway to attempt to identify these unknown metabolites. Proteomics data for this cohort are presently being gathered. Analysis of this data will provide a mechanistic insight of how the genes identified may influence the production of metabolites, which could influence the pathophysiology of PTB.

To our knowledge, this is the first study to have used NMR metabolic profiling of a clearly defined cohort of high and low-risk sPTB participants. Another unique aspect was the collection of multiple omics data from the same

participants, which highlighted the potential role of several metabolites in the initiation of early labour. This phenotypically well-defined cohort of patient samples provides invaluable resources for future studies to be undertaken to enhance our understanding of the sPTB pathophysiology.

## Clinical perspectives

- Spontaneous preterm births (PTB) are a major cause of infant morbidity and mortality worldwide. This condition remains poorly understood and there is a need for biomarkers that can aid patient stratification and predict phenotypes of spontaneous preterm birth.
- The present study demonstrated that metabolite signatures differ between spontaneous PTB cases and term controls. Further analysis of metabolomic data with genomic data from the same participants indicate the potential role of the inflammation pathway via the *TRAF1* gene.
- This is the first study to recruit and phenotype pregnant women for multi-omic investigation at high-risk and low-risk of spontaneous preterm birth. Further validation of these multi-omic biomarkers may allow screening for spontaneous preterm birth risk in asymptomatic women in early pregnancy.

## Data Availability

Metabolomic analysis data are available in the open-access repository MetaboLights, study ID: MTBLS1990.

## Competing Interests

The authors declare that there are no competing interests associated with the manuscript.

## Funding

The Harris-Wellbeing Research Centre was funded by the Wellbeing of Women charity, London, for this research.

## Open Access

Open access for this article was enabled by the participation of University of Liverpool in an all-inclusive *Read & Publish* pilot with Portland Press and the Biochemical Society under a transformative agreement with JISC.

## CRedit Author Contribution

**Juhi Gupta:** Conceptualization, Data curation, Formal analysis, Investigation, Visualization, Methodology, Writing—original draft, Writing—review and editing. **Angharad Care:** Conceptualization, Resources, Supervision, Funding acquisition, Investigation, Methodology, Writing—original draft, Writing—review and editing. **Laura Goodfellow:** Conceptualization, Resources, Supervision, Methodology, Writing—original draft. **Zarko Alfirevic:** Conceptualization, Resources, Funding acquisition, Methodology, Writing—review and editing. **Lu-Yun Lian:** Resources, Investigation, Methodology, Writing—review and editing. **Bertram Müller-Myhsok:** Conceptualization, Resources, Supervision, Validation, Investigation, Methodology, Writing—original draft, Writing—review and editing. **Ana Alfirevic:** Conceptualization, Supervision, Funding acquisition, Methodology, Writing—original draft, Writing—review and editing. **Marie M. Phelan:** Conceptualization, Resources, Data curation, Formal analysis, Supervision, Investigation, Visualization, Methodology, Writing—original draft, Writing—review and editing.

## Acknowledgements

We would like to acknowledge the study participants, the researchers (including Daniel Thomas and Raven Chandramohan from Ngee Ann Polytechnic) at the NMR Centre for Structural Biology for assisting with NMR data acquisition and preparation for analysis and the Oxford Genomics Centre (Wellcome Centre for Human Genetics) for processing our DNA samples on Biobank Axiom™ array (Thermo Fisher). We would also like to acknowledge the study participants and our research funders, Wellbeing of Women charity, London.

## Abbreviations

ANOVA, analysis of variance; AUC, area under the curve; EQTL, expression quantitative trait loci; GTEx, Genotype-Tissue Expression Project; HTERM, high-risk term; LLETZ, large loop excision of the transformation zone; LOOCV, leave-one-out cross validation; LTERM, low-risk term; MGWAS, metabolomics genome-wide association; NMR, nuclear magnetic resonance; PNN,

probabilistic neural network; PPRM, preterm premature rupture of membranes; PTB, preterm birth; SNP, single-nucleotide polymorphism; SPTB, spontaneous preterm birth.

## References

- Menon, R. (2008) Spontaneous preterm birth, a clinical dilemma: etiologic, pathophysiologic and genetic heterogeneities and racial disparity. *Acta Obstet. Gynecol. Scand.* **87**, 590–600, <https://doi.org/10.1080/00016340802005126>
- Liu, L., Oza, S., Hogan, D., Perin, J., Rudan, I., Lawn, J.E. et al. (2015) Global, regional, and national causes of child mortality in 2000–13, with projections to inform post-2015 priorities: an updated systematic analysis. *Lancet North Am. Ed.* **385**, 430–440, [https://doi.org/10.1016/S0140-6736\(14\)61698-6](https://doi.org/10.1016/S0140-6736(14)61698-6)
- Li, J., Lu, Y.P., Reichetzeder, C., Kalk, P., Kleuser, B., Adamski, J. et al. (2016) Maternal PCaC38:6 is associated with preterm birth - a risk factor for early and late adverse outcome of the offspring. *Kidney Blood Press. Res.* **41**, 250–257, <https://doi.org/10.1159/000443428>
- Lindon, J., Nicholson, J., Holmes, E. and Everett, J. (2000) Metabonomics: metabolic processes studied by NMR spectroscopy of biofluids. *Concepts Magn. Reson.* **12**, 289–320, [https://doi.org/10.1002/1099-0534\(2000\)12:5%3c289::AID-CMR3%3e3.0.CO;2-W](https://doi.org/10.1002/1099-0534(2000)12:5%3c289::AID-CMR3%3e3.0.CO;2-W)
- Capece, A., Vasieva, O., Meher, S., Alfirevic, Z. and Alfirevic, A. (2014) Pathway analysis of genetic factors associated with spontaneous preterm birth and pre-labor preterm rupture of membranes. *PLoS ONE* **9**, e108578, <https://doi.org/10.1371/journal.pone.0108578>
- Amabebe, E., Reynolds, S., Stern, V.L., Parker, J.L., Stafford, G.P., Paley, M.N. et al. (2016) Identifying metabolite markers for preterm birth in cervicovaginal fluid by magnetic resonance spectroscopy. *Metabolomics* **12**, 67, <https://doi.org/10.1007/s11306-016-0985-x>
- Virgiliou, C., Gika, H.G., Witting, M., Bletsou, A.A., Athanasiadis, A., Zafrakas, M. et al. (2017) Amniotic fluid and maternal serum metabolic signatures in the second trimester associated with preterm delivery. *J. Proteome Res.* **16**, 898–910, <https://doi.org/10.1021/acs.jproteome.6b00845>
- Engle, W.A., Tomashek, K.M., Wallman, C. and the Committee on Fetus and Newborn (2007) “Late-preterm” infants: a population at risk. *Pediatrics* **120**, 1390–1401, <https://doi.org/10.1542/peds.2007-2952>
- NHS England (2019) Saving Babies’ Lives Care Bundle Version 2. <https://www.england.nhs.uk/publication/saving-babies-lives-version-two-a-care-bundle-for-reducing-perinatal-mortality/> [Accessed: 19/03/2021]
- Diaz, S.O., Pinto, J., Graca, G., Duarte, I.F., Barros, A.S., Galhano, E. et al. (2011) Metabolic biomarkers of prenatal disorders: an exploratory NMR metabonomics study of second trimester maternal urine and blood plasma. *J. Proteome Res.* **10**, 3732–3742, <https://doi.org/10.1021/pr200352m>
- Maitre, L., Fthenou, E., Athersuch, T., Coen, M., Toledano, M.B., Holmes, E. et al. (2014) Urinary metabolic profiles in early pregnancy are associated with preterm birth and fetal growth restriction in the Rhea mother-child cohort study. *BMC MEDICINE* **12**, <https://doi.org/10.1186/1741-7015-12-110>
- Graca, G., Goodfellow, B.J., Barros, A.S., Diaz, S., Duarte, I.F., Spagou, K. et al. (2012) UPLC-MS metabolic profiling of second trimester amniotic fluid and maternal urine and comparison with NMR spectral profiling for the identification of pregnancy disorder biomarkers. *Mol. Biosyst.* **8**, 1243–1254, <https://doi.org/10.1039/c2mb05424h>
- Dettmer, K., Aronov, P.A. and Hammock, B.D. (2007) Mass spectrometry-based metabolomics. *Mass Spectrom. Rev.* **26**, 51–78, <https://doi.org/10.1002/mas.20108>
- Dunn, W.B., Bailey, N.J. and Johnson, H.E. (2005) Measuring the metabolome: current analytical technologies. *Analyst* **130**, 606–625, <https://doi.org/10.1039/b418288j>
- Goodacre, R., Vaidyanathan, S., Dunn, W.B., Harrigan, G.G. and Kell, D.B. (2004) Metabolomics by numbers: acquiring and understanding global metabolite data. *Trends Biotechnol.* **22**, 245–252, <https://doi.org/10.1016/j.tibtech.2004.03.007>
- Orczyk-Pawilowicz, M., Jawien, E., Deja, S., Hirmle, L., Zabek, A. and Mlynarz, P. (2016) Metabolomics of Human Amniotic Fluid and Maternal Plasma during Normal Pregnancy. *PLoS ONE* **11**, e0152740, <https://doi.org/10.1371/journal.pone.0152740>
- Holmes, E., Nicholson, J.K. and Tranter, G. (2001) Metabonomic characterization of genetic variations in toxicological and metabolic responses using probabilistic neural networks. *Chem. Res. Toxicol.* **14**, 182–191, <https://doi.org/10.1021/bx000158x>
- Specht, D.F. (1990) Probabilistic neural networks. *Neural Netw.* **3**, 109–118, [https://doi.org/10.1016/0893-6080\(90\)90049-Q](https://doi.org/10.1016/0893-6080(90)90049-Q)
- Ruedi, R., Mallol, R., Raffler, J., Lamparter, D., Friedrich, N., Vollenweider, P. et al. (2017) Metabomatching: using genetic association to identify metabolites in proton NMR spectroscopy. *PLoS Comput. Biol.* **13**, e1005839, <https://doi.org/10.1371/journal.pcbi.1005839>
- Monteiro, M.S., Carvalho, M., Bastos, M.L. and Guedes de Pinho, P. (2013) Metabolomics analysis for biomarker discovery: advances and challenges. *Curr. Med. Chem.* **20**, 257–271, <https://doi.org/10.2174/092986713804806621>
- Tita, A.T.N., Landon, M.B., Spong, C.Y., Lai, Y., Leveno, K.J., Varner, M.W. et al. (2009) Timing of elective cesarean delivery at term and neonatal outcomes. *N. Engl. J. Med.* **360**, 111–120, <https://doi.org/10.1056/NEJMoa0803267>
- Sengupta, S., Carrion, V., Shelton, J., Wynn, R.J., Ryan, R.M., Singhal, K. et al. (2013) Adverse neonatal outcomes associated with early-term birth. *JAMA Pediatr.* **167**, 1053–1059, <https://doi.org/10.1001/jamapediatrics.2013.2581>
- Helle, E., Andersson, S., Häkkinen, U., Järvelin, J., Eskelinen, J. and Kajantie, E. (2016) Morbidity and health care costs after early term birth. *Paediatr. Perinat. Epidemiol.* **30**, 533–540, <https://doi.org/10.1111/ppe.12321>
- McIntire, D.D. and Leveno, K.J. (2008) Neonatal mortality and morbidity rates in late preterm births compared with births at term. *Obstet. Gynecol.* **111**, 35–41, <https://doi.org/10.1097/01.AOG.0000297311.33046.73>
- Bastek, J.A., Sammel, M.D., Paré, E., Srinivas, S.K., Posencheg, M.A. and Elovitz, M.A. (2008) Adverse neo-natal outcomes: examining the risks between preterm, late preterm, and term infants. *Am. J. Obstet. Gynecol.* **199**, 367.e1–368.e1, <https://doi.org/10.1016/j.ajog.2008.08.002>
- Goldenberg, R.L., Gravett, M.G., Iams, J., Papageorgiou, A.T., Waller, S.A., Kramer, M. et al. (2012) The preterm birth syndrome: issues to consider in creating a classification system. *AJOG* **206**, 113–118, <https://doi.org/10.1016/j.ajog.2011.10.865>
- Soininen, P., Kangas, A.J., Würtz, P., Tukiainen, T., Tynkkynen, T., Laatikainen, R. et al. (2009) High-throughput serum NMR metabonomics for cost-effective holistic studies on systemic metabolism. *Analyst* **134**, 1781–1785, <https://doi.org/10.1039/b910205a>

- 28 Sumner, L.W., Amberg, A., Barrett, D., Beale, M.H., Beger, R., Daykin, C.A. et al. (2007) Proposed minimum reporting standards for chemical analysis. Chemical Analysis Working Group (CAWG) Metabolomics Standards Initiative (MSI). *Metabolomics* **3**, 211–221, <https://doi.org/10.1007/s11306-007-0082-2>
- 29 Haug, K., Cochrane, K., Nainala, V.C., Williams, M., Chang, J., Jayaseelan, K.V. et al. (2019) MetaboLights: a resource evolving in response to the needs of its scientific community. *Nucleic Acids Res.* **48**, D440–D444, <https://doi.org/10.1093/nar/gkz1019>
- 30 Dieterle, F., Ross, A., Schlotterbeck, G. and Senn, H. (2006) Probabilistic quotient normalization as robust method to account for dilution of complex biological mixtures. Application in 1H NMR metabolomics. *Anal. Chem.* **78**, 4281–4290, <https://doi.org/10.1021/ac051632c>
- 31 Fox, J. and Weisberg, S. (2019) *An R Companion to Applied Regression*, 3rd Ed, Sage, Thousand Oaks, CA
- 32 Wehrens, R. and Mevik, B. (2007) pls: Partial Least Squares Regression (PLSR) and Principal Component Regression (PCR), R package version 2.1-0.
- 33 Kuhn, M. (2008) Building Predictive Models in R Using the caret Package. *J. Statistical Software* **28**, 1–26, <https://doi.org/10.18637/jss.v028.i05>
- 34 Chong, J., Wishart, D.S. and Xia, J. (2019) Using MetaboAnalyst 4.0 for comprehensive and integrative metabolomics data analysis. *Curr. Protoc. Bioinformatics* **68**, e86, <https://doi.org/10.1002/cpbi.86>
- 35 Sherrod, P.H. (2014) DTREG predictive modeling software. <http://www.dtrek.com> [Accessed: 28/10/2020]
- 36 Chang, C.C., Chow, C.C., Tellier, L.C., Vattikuti, S., Purcell, S.M. and Lee, J.J. (2015) Second-generation PLINK: rising to the challenge of larger and richer datasets. *Gigascience* **4**, 7, <https://doi.org/10.1186/s13742-015-0047-8>
- 37 Anderson, C.A., Pettersson, F.H., Clarke, G.M., Cardon, L.R., Morris, A.P. and Zondervan, K.T. (2010) Data quality control in genetic case-control association studies. *Nat. Protoc.* **5**, 1564–1573, <https://doi.org/10.1038/nprot.2010.116>
- 38 Marees, A.T., de Kluiver, H., Stringer, S., Vorspan, F., Curis, E., Marie-Claire, C. et al. (2018) A tutorial on conducting genome-wide association studies: Quality control and statistical analysis. *Int. J. Methods Psychiatr. Res.* **27**, e1608, <https://doi.org/10.1002/mpr.1608>
- 39 International HapMap Consortium (2003) The International HapMap Project. *Nature* **426**, 789–796, <https://doi.org/10.1038/nature02168>
- 40 International HapMap Consortium (2005) A haplotype map of the human genome. *Nature* **437**, 1299–1320, <https://doi.org/10.1038/nature04226>
- 41 Das, S., Forer, L., Schonherr, S., Sidore, C., Locke, A.E., Kwong, A. et al. (2016) Next-generation genotype imputation service and methods. *Nat. Genet.* **48**, 1284–1287, <https://doi.org/10.1038/ng.3656>
- 42 Loh, P.R., Danecek, P., Palamara, P.F., Fuchsberger, C., Reshef, Y.A., Finucane, H.K. et al. (2016) Reference-based phasing using the Haplotype Reference Consortium panel. *Nat. Genet.* **48**, 1443–1448, <https://doi.org/10.1038/ng.3679>
- 43 Schurz, H., Muller, S.J., van Helden, P.D., Tromp, G., Hoal, E.G., Kinnear, C.J. et al. (2019) Evaluating the Accuracy of Imputation Methods in a Five-Way Admixed Population. *Front. Genet.* **10**, 34, <https://doi.org/10.3389/fgene.2019.00034>
- 44 Marchini, J. and Howie, B. (2010) Genotype imputation for genome-wide association studies. *Nat. Rev. Genet.* **11**, 499–511, <https://doi.org/10.1038/nrg2796>
- 45 Marchini, J., Howie, B., Myers, S., McVean, G. and Donnelly, P. (2007) A new multipoint method for genome-wide association studies by imputation of genotypes. *Nat. Genet.* **39**, 906–913, <https://doi.org/10.1038/ng2088>
- 46 Wellcome Trust Case Control Consortium (2007) Genome-wide association study of 14,000 cases of seven common diseases and 3,000 shared controls. *Nature* **447**, 661–678, <https://doi.org/10.1038/nature05911>
- 47 Turner, S.D. (2018) qqman: an R package for visualizing GWAS results using Q-Q and manhattan plots. *J. Open Source Software* **3**, 731, <https://doi.org/10.21105/joss.00731>
- 48 Watanabe, K., Taskesen, E., van Bochoven, A. and Posthuma, D. (2017) Functional mapping and annotation of genetic associations with FUMA. *Nat. Commun.* **8**, 1826, <https://doi.org/10.1038/s41467-017-01261-5>
- 49 Sudmant, P.H., Rausch, T., Gardner, E.J., Handsaker, R.E., Abyzov, A., Huddleston, J. et al. (2015) An integrated map of structural variation in 2,504 human genomes. *Nature* **526**, 75–81, <https://doi.org/10.1038/nature15394>
- 50 Auton, A., Brooks, L.D., Durbin, R.M., Garrison, E.P., Kang, H.M., The 1000 Genomes Project Consortium et al. (2015) A global reference for human genetic variation. *Nature* **526**, 68–74, <https://doi.org/10.1038/nature15393>
- 51 Wickham, H. (2016) *ggplot2: Elegant Graphics for Data Analysis*, Springer-Verlag, New York, ISBN 978-3-319-24277-4
- 52 Kanehisa, M. and Goto, S. (2000) KEGG: kyoto encyclopedia of genes and genomes. *Nucleic Acids Res.* **28**, 27–30, <https://doi.org/10.1093/nar/28.1.27>
- 53 Bachelis, J., Juodakis, J., Sengpiel, V., Zhang, G., Myhre, R., Muglia, L.J. et al. (2016) Literature-informed analysis of a genome-wide association study of gestational age in norwegian women and children suggests involvement of inflammatory pathways. *PLoS ONE* **11**, e0160335, <https://doi.org/10.1371/journal.pone.0160335>
- 54 MacIntyre, D.A., Sykes, L., Teoh, T.G. and Bennett, P.R. (2012) Prevention of preterm labour via the modulation of inflammatory pathways. *J. Matern. Fetal Neonatal Med.* **25**, 17–20, <https://doi.org/10.3109/14767058.2012.666114>
- 55 Bream, E.N., Leppelle, C.R., Cooper, M.E., Dagle, J.M., Merrill, D.C., Christensen, K. et al. (2013) Candidate gene linkage approach to identify DNA variants that predispose to preterm birth. *Pediatr. Res.* **73**, 135–141, <https://doi.org/10.1038/pr.2012.166>
- 56 Palsson-McDermott, E.M. and O'Neill, L.A. (2013) The Warburg effect then and now: from cancer to inflammatory diseases. *Bioessays* **35**, 965–973, <https://doi.org/10.1002/bies.201300084>
- 57 Ratter, J.M., Rooijackers, H.M.M., Hooiveld, G.J., Hijmans, A.G.M., de Galan, B.E., Tack, C.J. et al. (2018) In vitro and in vivo effects of lactate on metabolism and cytokine production of human primary PBMCs and monocytes. *Front. Immunol.* **9**, 2564, <https://doi.org/10.3389/fimmu.2018.02564>
- 58 Andersen, L.W., Mackenhauer, J., Roberts, J.C., Berg, K.M., Cocchi, M.N. and Donnino, M.W. (2013) Etiology and therapeutic approach to elevated lactate levels. *Mayo Clin. Proc.* **88**, 1127–1140, <https://doi.org/10.1016/j.mayocp.2013.06.012>
